# Supplementary material for: A flexible humidity sensor based on silk fabrics for human respiration monitoring
Source: Royal Society of Chemistry journal article supplement (doi:10.1039/c8tc00238j), 2018-01-01
Supplement: c8tc00238j1.pdf [file c8tc00238j1.pdf]

## Supporting Information

# Flexible Humidity Sensor Based on Silk Fabric for Monitoring Human Respiration

Bintian Li<sup>1,2</sup>, Gang Xiao<sup>1,2</sup>, Feng Liu<sup>1,2</sup>, Yan Qiao<sup>1,2</sup>, Chang Ming Li<sup>1,2\*</sup> and Zhisong Lu,<sup>1,2 \*</sup>

<sup>1</sup> Chongqing Key Laboratory for Advanced Materials & Technologies of Clean Energies, Southwest University, 1 Tiansheng Road, Chongqing 400715, P. R. China

<sup>2</sup> Institute for Clean Energy & Advanced Materials, Faculty of Materials & Energy, Southwest University, 1 Tiansheng Road, Chongqing 400715, P. R. China

\*: Author to whom correspondence should be addressed. E-mail: zslu@swu.edu.cn and ecmlu@swu.edu.cn; Fax: +86-23-68254969; Tel.: +86-23-68254943.

## Results

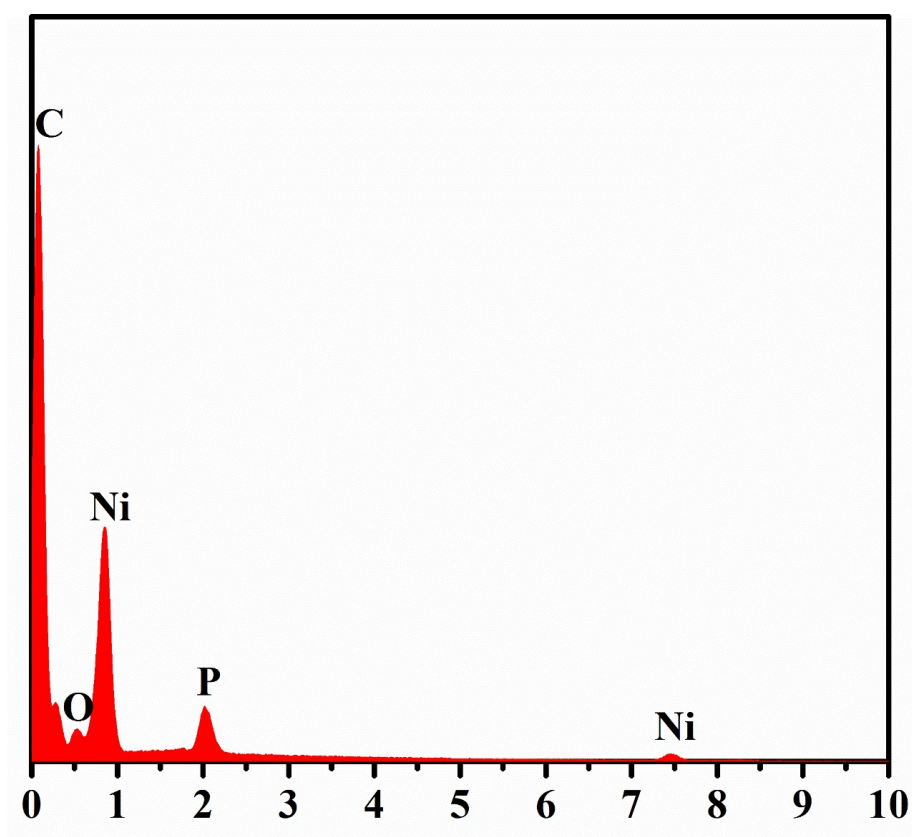

Figure S1. EDS spectrum of a GO-Ni-coated silk fabric.

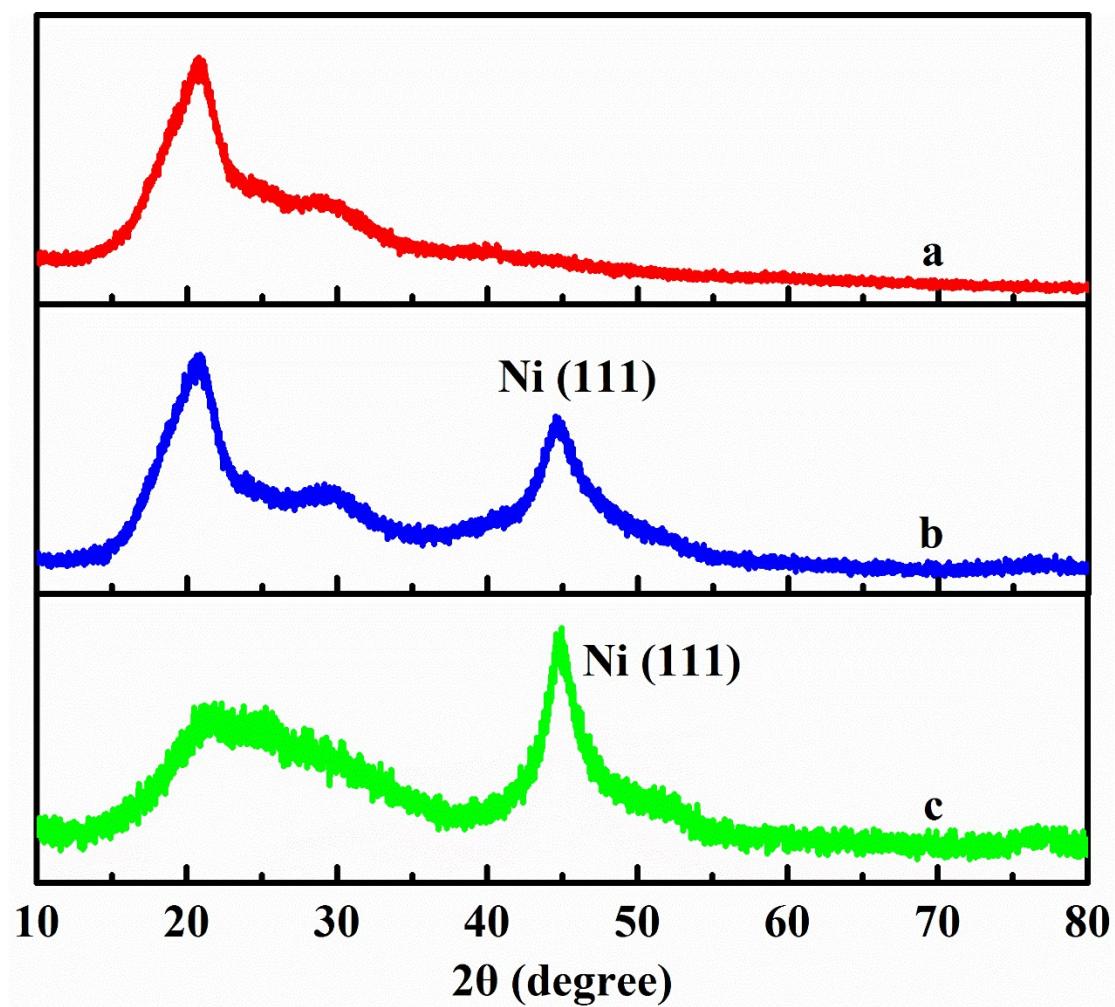

Figure S2. XRD patterns of pristine (a), Ni-deposited (b), GO-Ni-coated (c) silk fabrics, respectively.

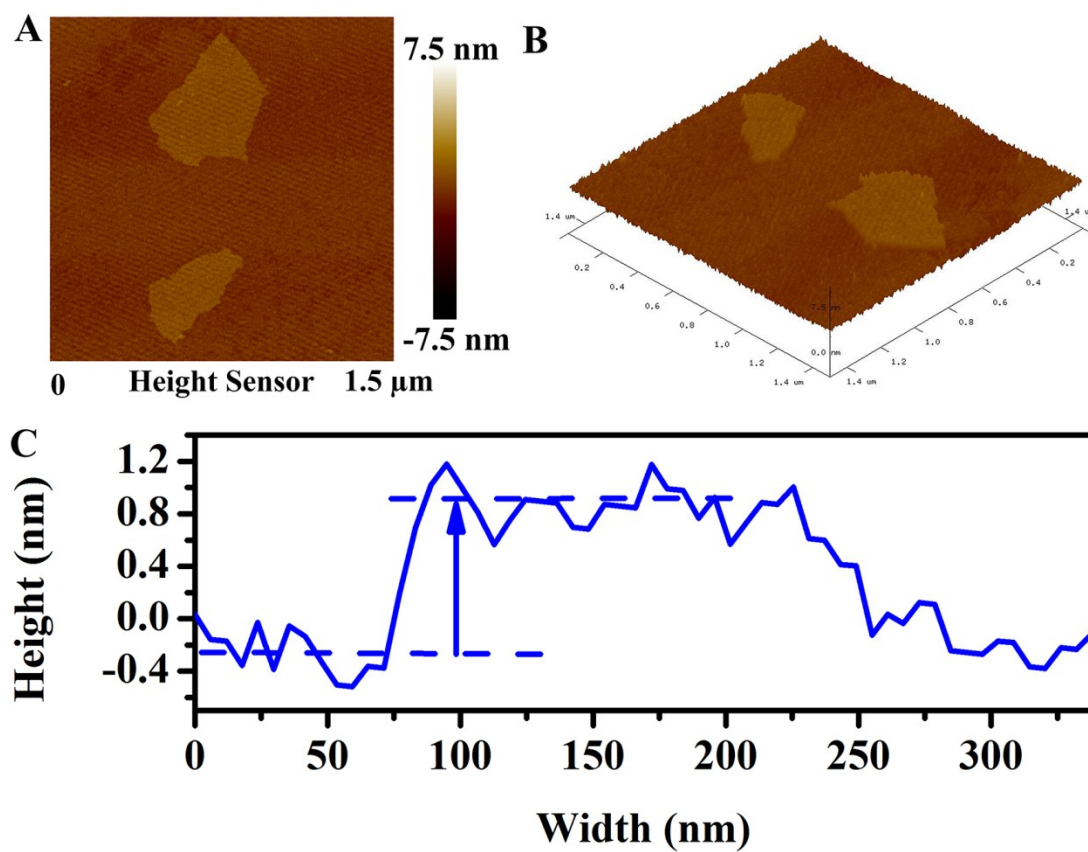

Figure S3. AFM image of GO with 2D (A) and 3D topography (B). The section curve (C) of a GO nanosheet on a mica substrate.

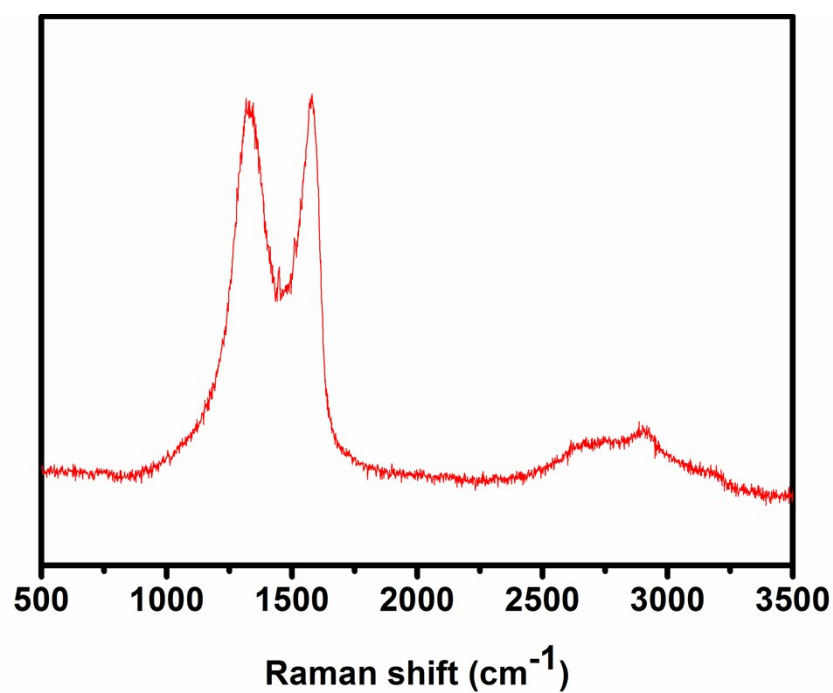

Figure S4. Raman spectrum of the silk fabric-attached GO

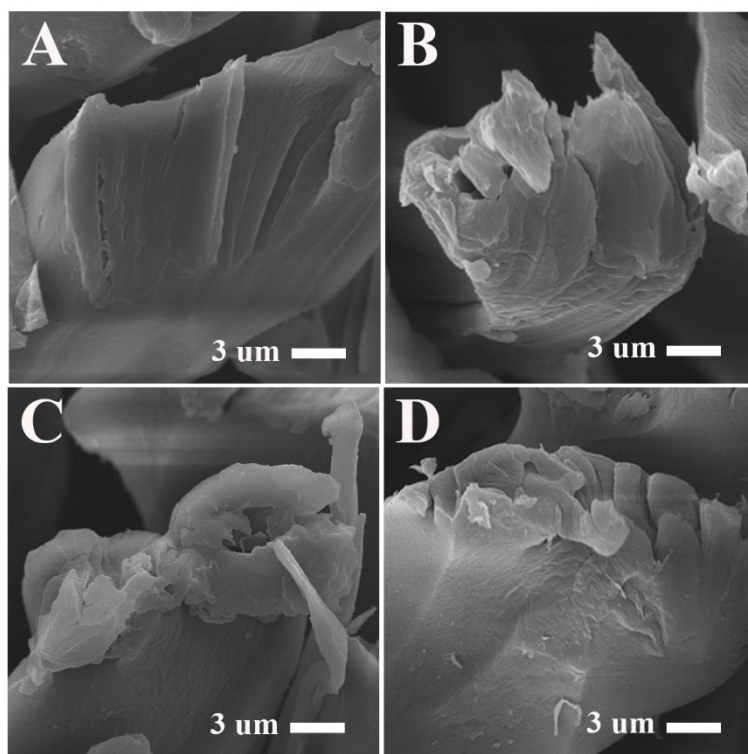

Figure S5. Cross-sections of the GO-immobilized silk fabrics. (A)-(D) correspond to 0.07, 0.14, 0.21 and 0.28 mg/cm<sup>2</sup>, respectively.

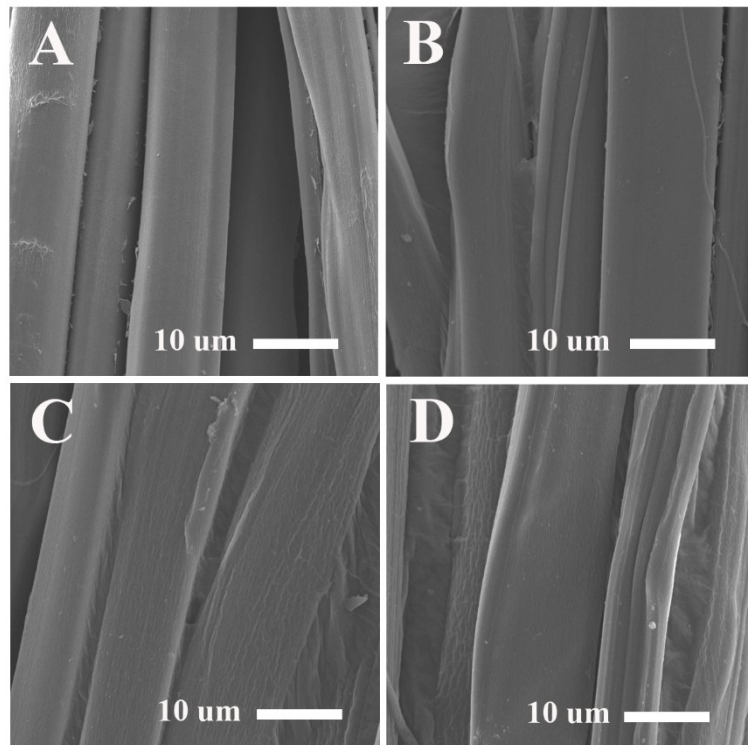

Figure S6. Surface morphologies of the GO-immobilized silk fabrics. (A)-(D) correspond to 0.07, 0.14, 0.21 and 0.28 mg/cm<sup>2</sup>, respectively.

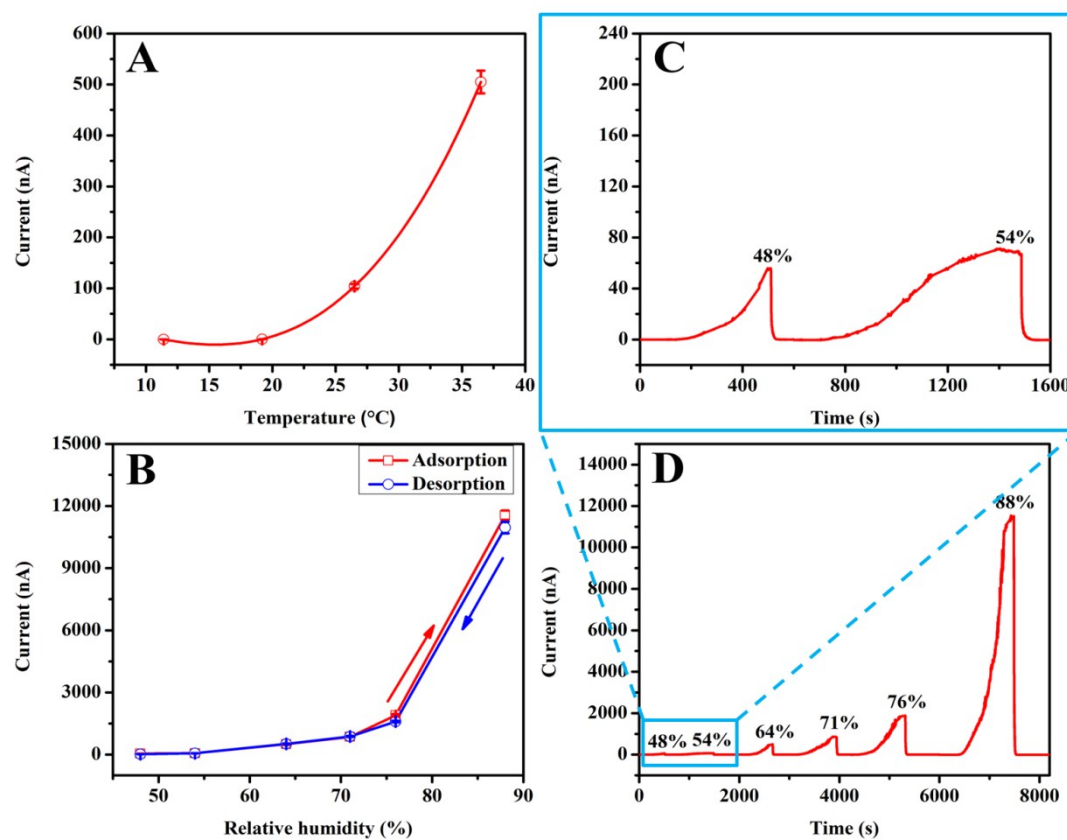

Figure S7. (A) Current response of the respiration sensor under different environment temperature (RH 64%); (B) The adsorption and desorption curves of the sensor; (C) Response of the sensor to the relative humidity of 48% and 54% with a larger magnification; (D) Response of the sensor to the relative humidity of 48%, 54%, 64%, 71%, 76% and 88% at 36.5 °C.



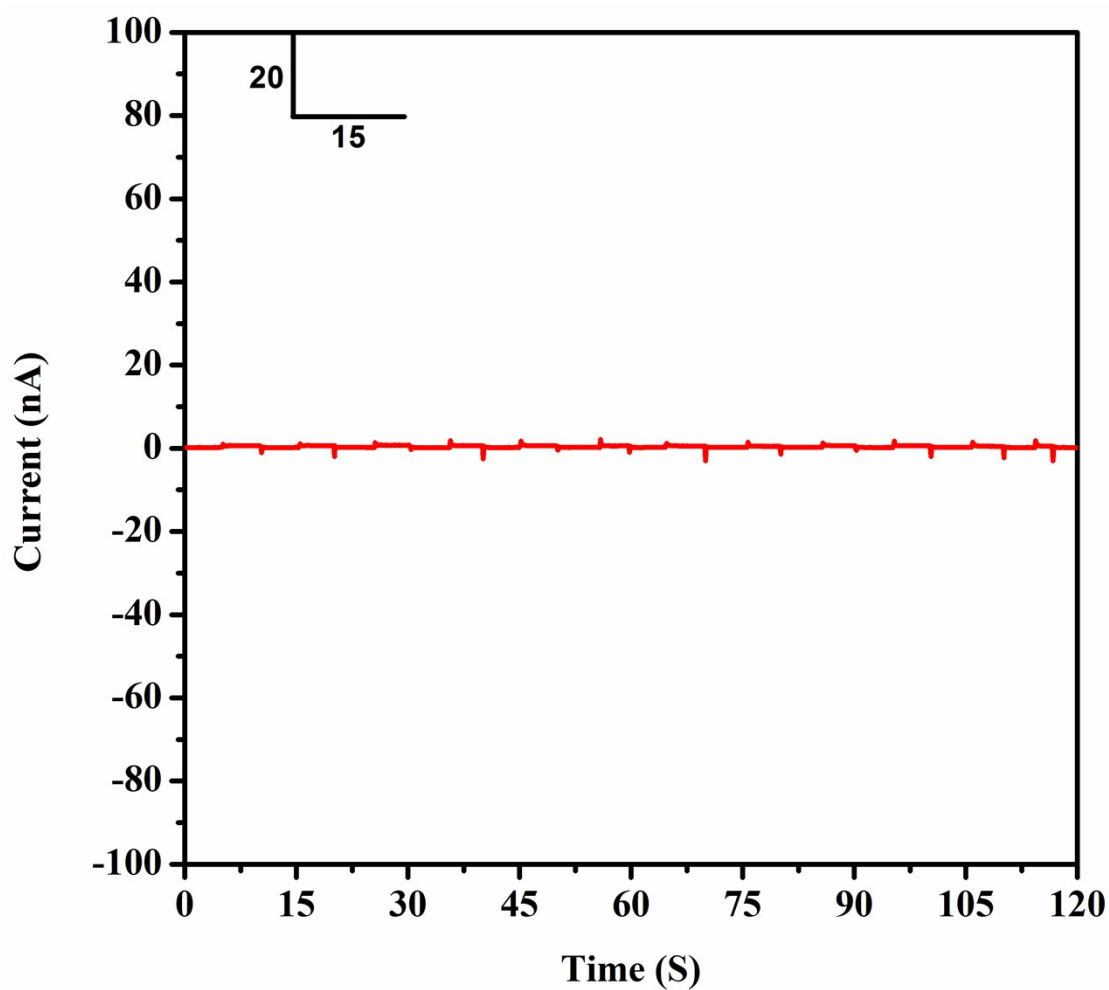

Figure S8. Current response of the as-prepared respiration sensor to finger tapping.

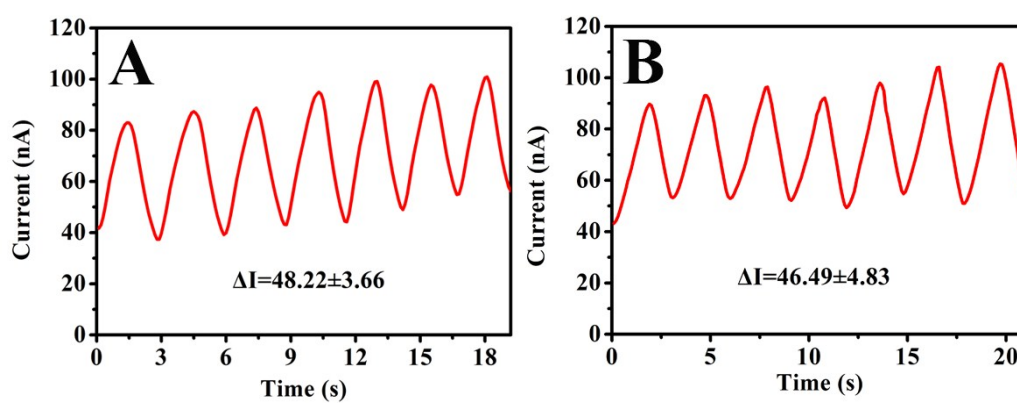

Figure S9. Sensing performance before and after being stored under ambient conditions for one month.
